# Supplementary material
Source: PubMed Central journal article supplement (PMC3490584)
Supplement: supp_pp.112.202291_202291suppdata.pdf [file supp_pp.112.202291_202291suppdata.pdf]

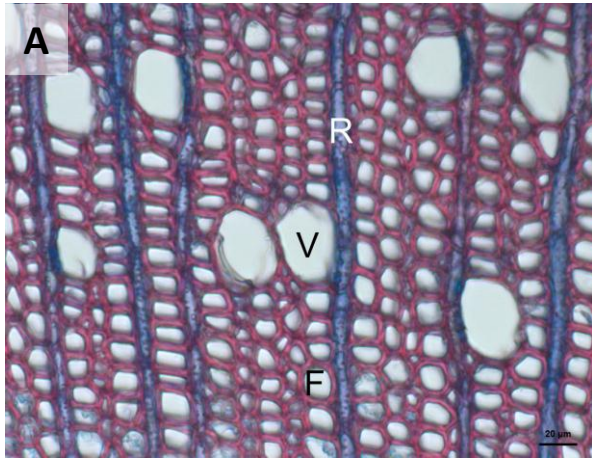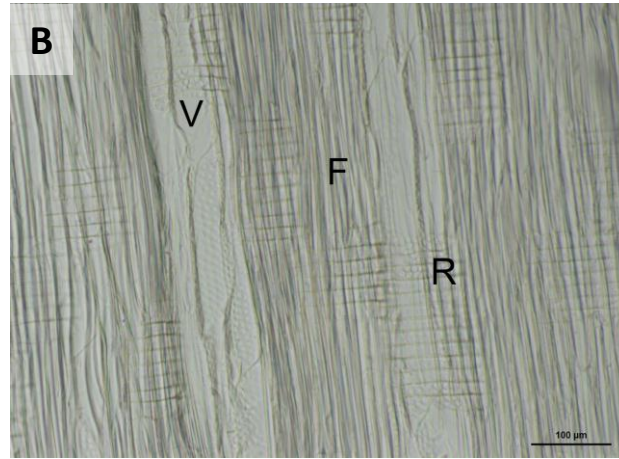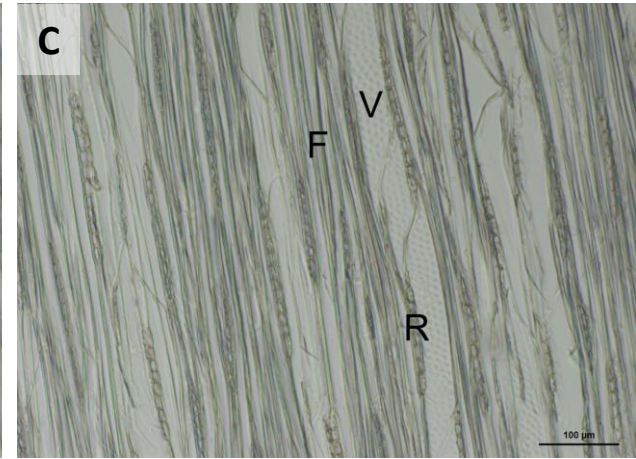

**Supplemental Figure S1.** Wood anatomy. A, Light micrograph of a cross section of mature wood used in this study. Ray parenchyma cells (R) appear blue-stained. In addition vessels (V) and fibers (F) occur. B, Light micrograph of a radial section of the same wood. C, Light micrograph of a tangential section of the same wood. No axial parenchyma cells were detectable in all three planes.

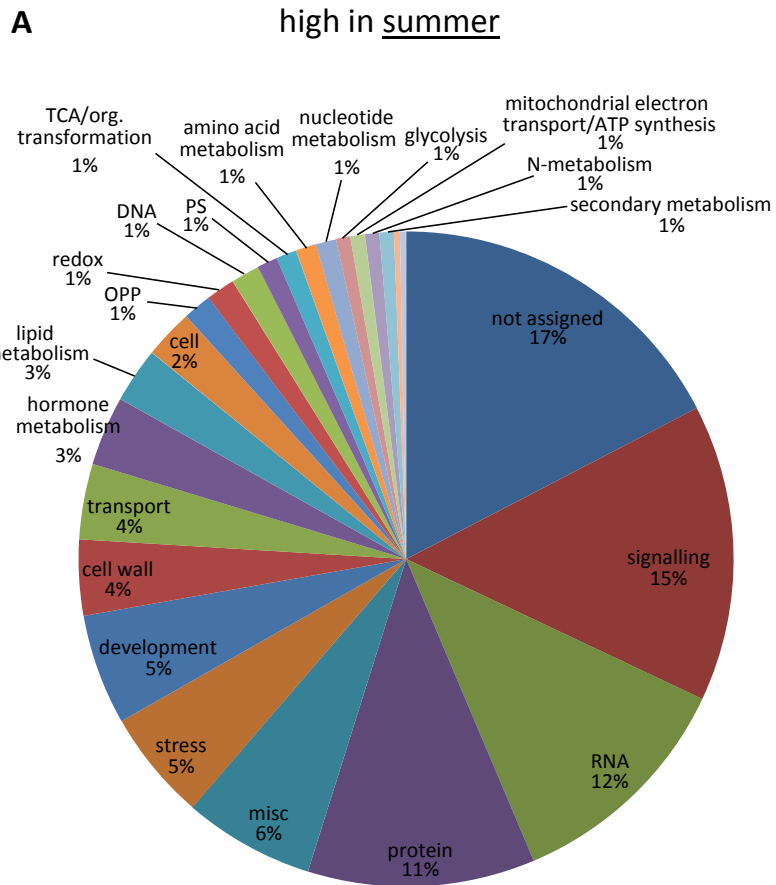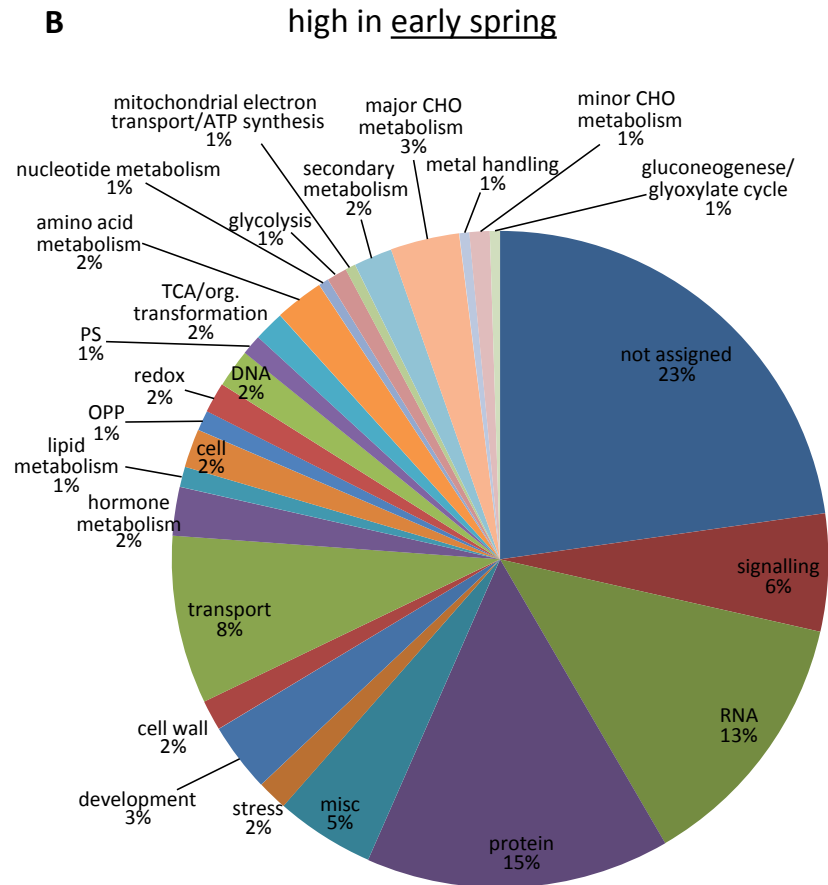

**Supplemental Figure S2.** Clustering of *Populus x canadensis* differently expressed genes in rays (summer vs. early spring).

The 500 most significantly regulated mapped genes were imported into MapMan 3.5.1 and classified accordingly. Clusters revealed seasonal function of wood rays. A, Genes up-regulated in summer. B, Genes up-regulated in early spring.

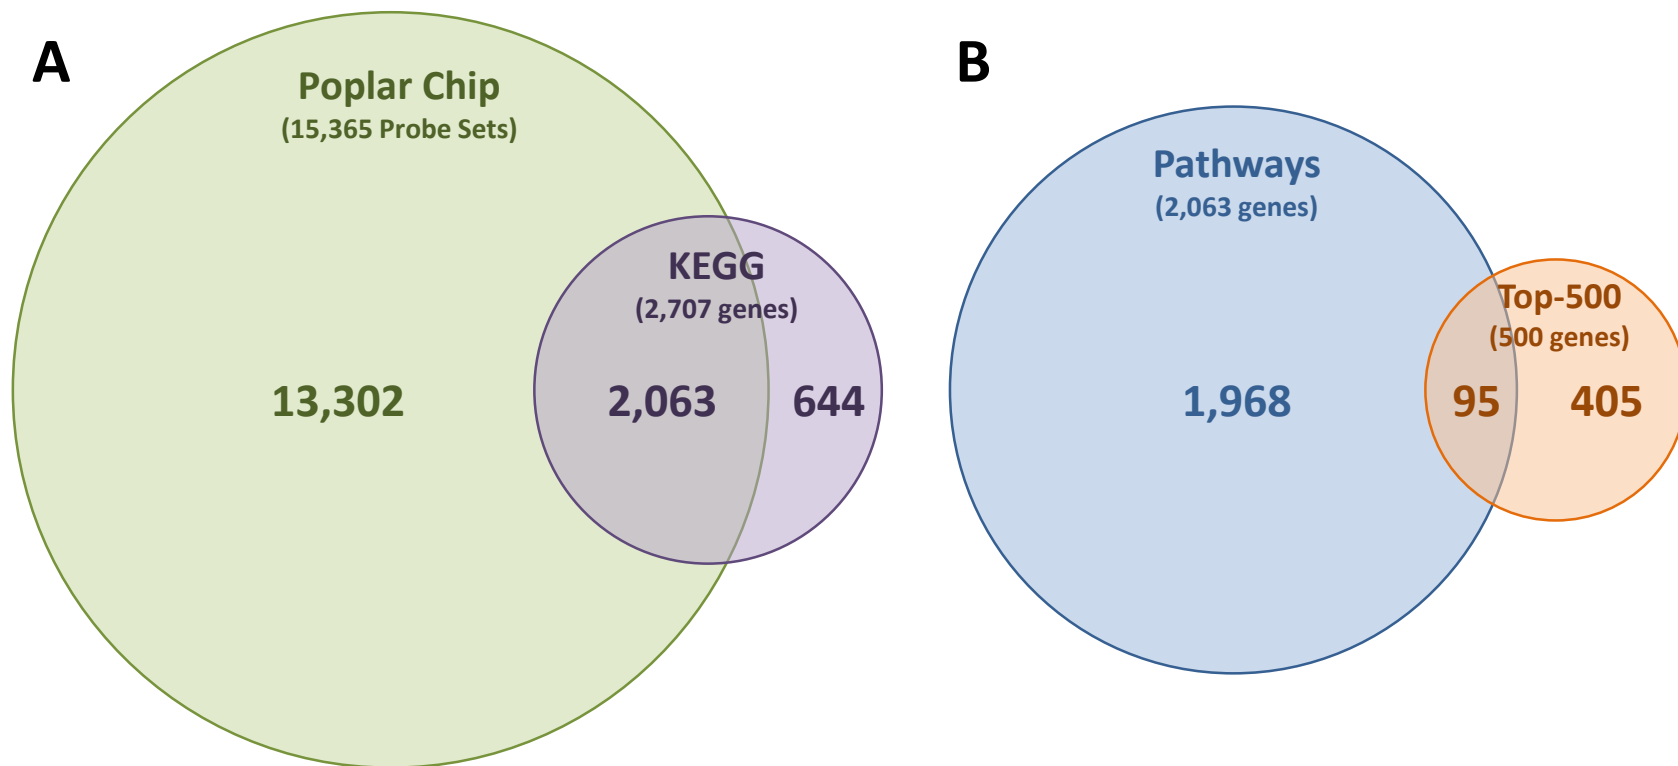

**Supplemental Figure S3.** KEGG pathway coverage. A, Of the 2,707 genes annotated in the 115 KEGG-pathways, 2,063 (76.2 %) genes representing 101 pathways were found within the 15,365 mapped genes on the chip. In turn only 13.4 % of the mapped chip genes are covered by KEGG pathways. B, The 2,063 KEGG pathway genes shown in A, to be represented on the poplar chip covered only 19 % of the 500 most significantly regulated genes.

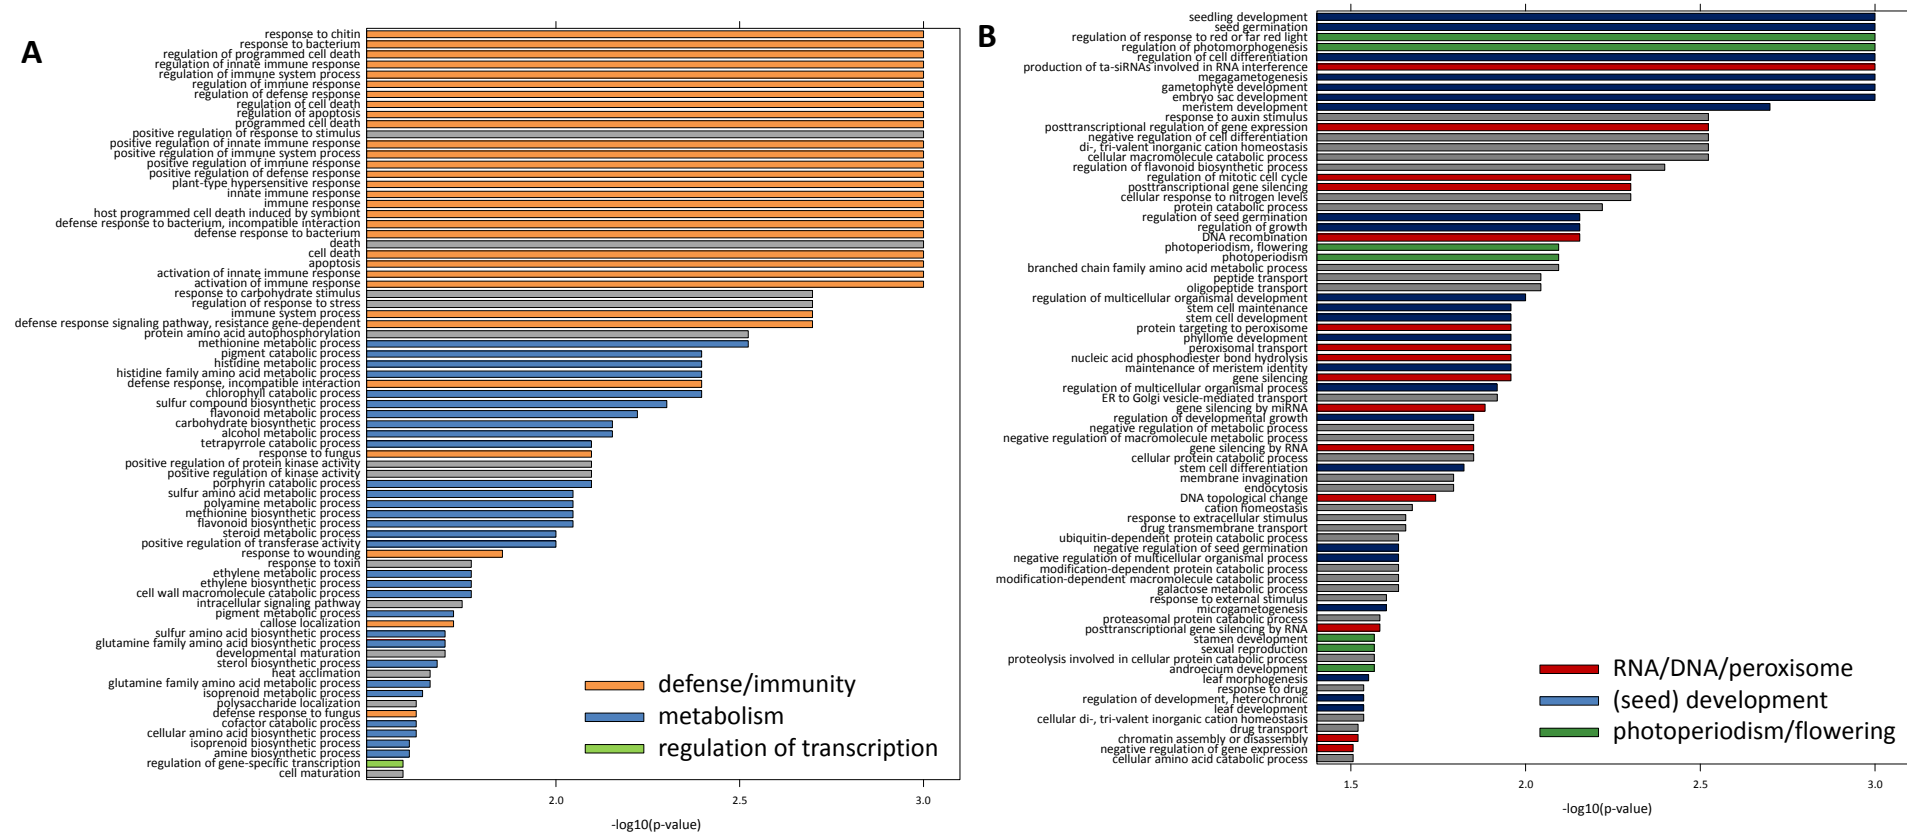

**Supplemental Figure S4.** GO enrichment analysis of biological processes (competitive test). In total 1,075 pathways have been analyzed. All significant pathways (after multiple testing correction) are represented by the negative decadic logarithm of the enrichment p-value (i.e. longer bars represent more significant pathways). Coloring depicts the higher level cellular process of each pathway. A, Pathways up-regulated in summer. B, Pathways up-regulated in early spring.

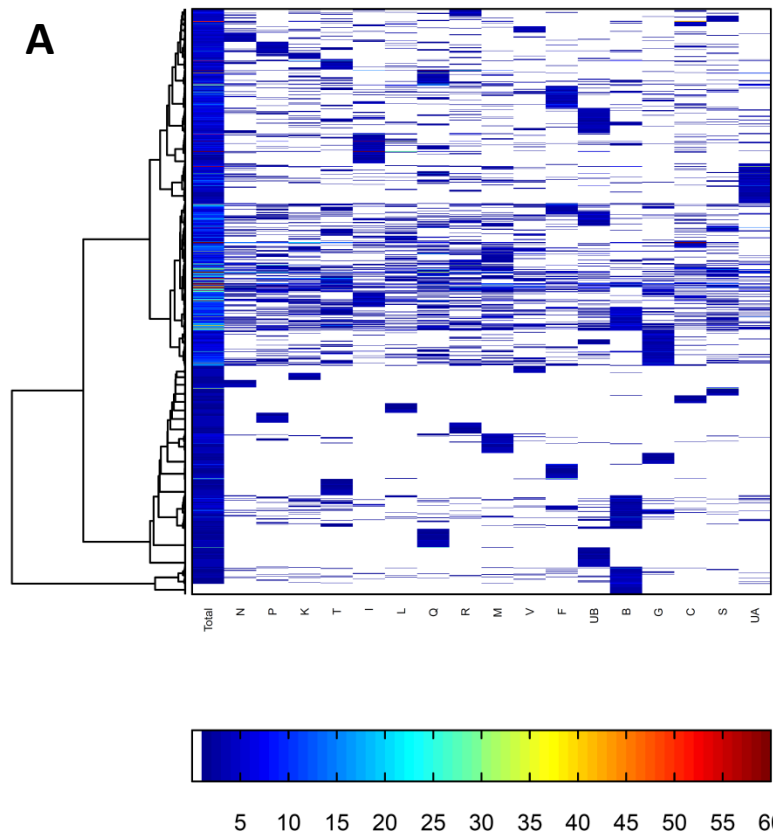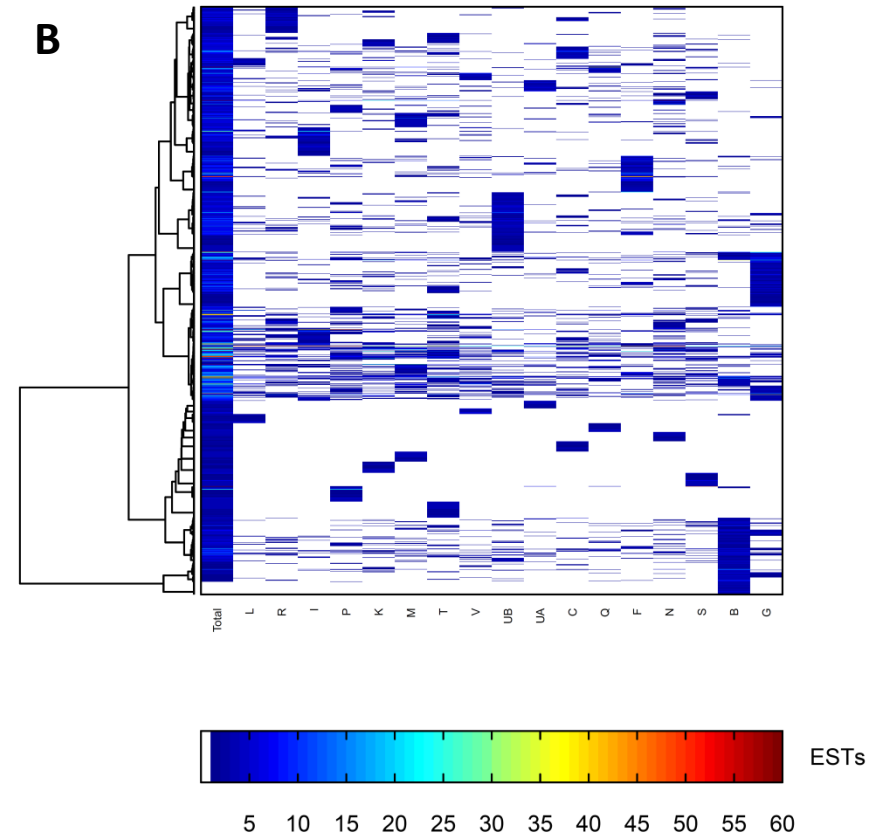

**Supplemental Figure S5:** Comparison of rays with other seasonal array analyses. Digital northern heat map generated using the PopGenIE eNorthern tool showing the frequency of occurrence of genes up-regulated in dormant rays (A) and in active rays (B) within the expressed sequence tag (EST) libraries represented at PopulusDB (Sterky *et al.*, 2004; <http://www.populus.db.umu.se/>). A + B = cambial zone, UB = active cambium, dormant UA = cambium, G = tension wood, X = wood cell death, C = young leaves, I = senescing leaves, L = cold-stressed leaves, Q = dormant buds, P = petioles, Y = virusfungal-infected leaves, F = floral buds, M = female catkins, V = male catkins, K = apical shoot, T = shoot meristem, N = bark, R = roots, S = imbibed seeds (according to Sterky *et al.* 2004)

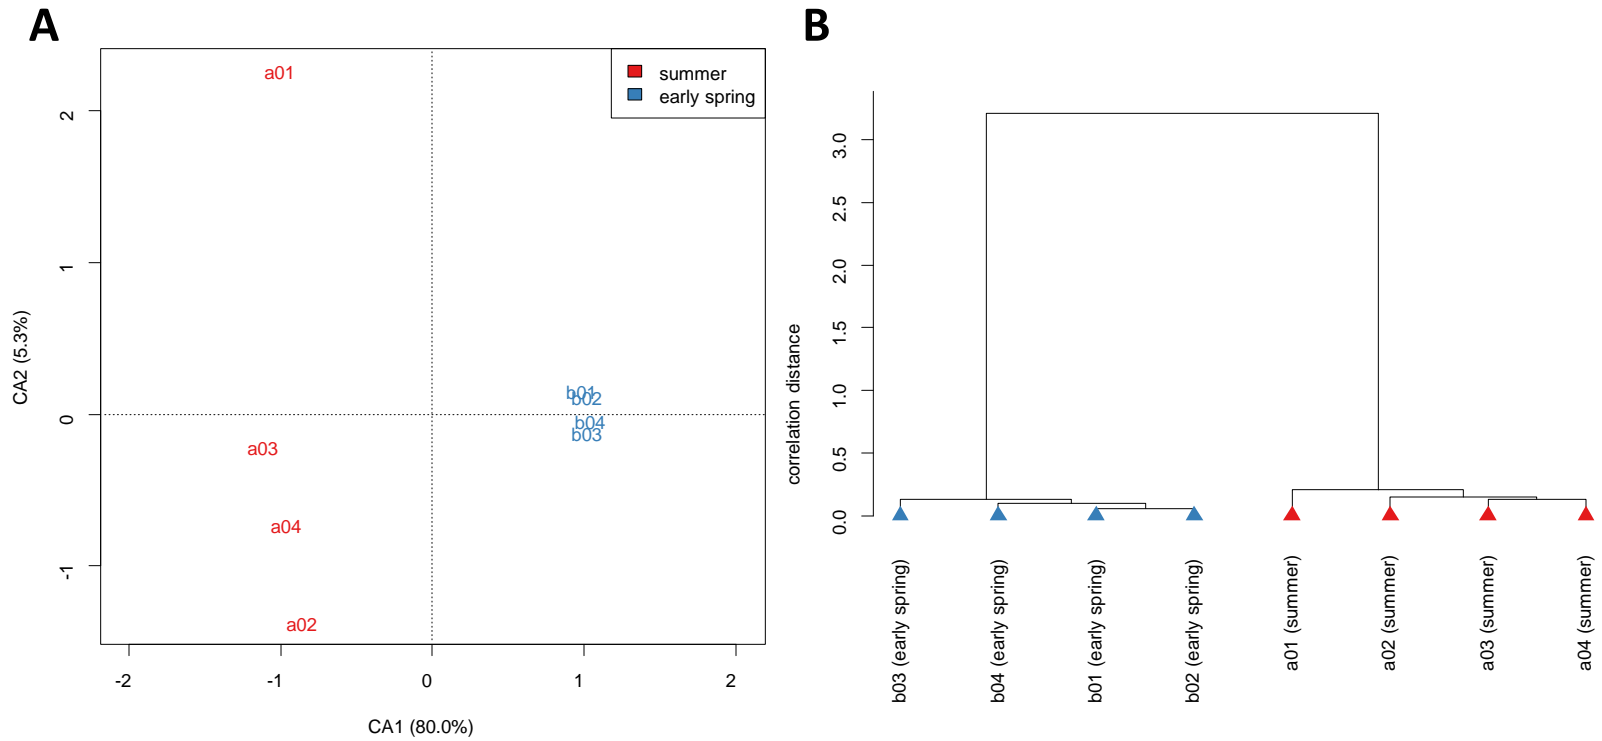

**Supplemental Figure S6.** Exploratory array analysis by hierarchical clustering and correspondence analysis (CA). Summer and early spring samples are clearly separated. A, CA (top 5% of the genes with maximal variance). B, Hierarchical Clustering (top 5% of the genes with maximal variance).

## Larisch et al., Supplemental Table S1

Summer / early spring fold changes of transcripts related to metabolites mentioned in Table 1 and Table 2

FC in blue = up-regulated in early spring, FC in red = up-regulated in summer

|                               |
|-------------------------------|
| N-assimilation                |
| fatty acid metabolism         |
| cryo-protection               |
| starch and sucrose metabolism |

| Probe.Set                 | Description                                                                                                                   | AGI       | logFC  | FC     | P.Value   | adj.P.Val |
|---------------------------|-------------------------------------------------------------------------------------------------------------------------------|-----------|--------|--------|-----------|-----------|
| PtpAffx.141421.1.S1_at    | ATSP51F   ATSP51F (sucrose phosphate synthase 1F); sucrose-phosphate synthase/ transferase, transferring glycosyl groups      | AT5G20280 | -3.003 | 0.125  | 7.847E-04 | 5.603E-03 |
| PtpAffx.23657.1.S1_s_at   | SUS3, ATUS3   SUS3 (sucrose synthase 3); UDP-glycosyltransferase/ sucrose synthase/ transferase, transferring glycosyl groups | AT4G02280 | -2.847 | 0.139  | 4.805E-04 | 3.919E-03 |
| PtpAffx.44916.2.A1_at     | SNF4, ATSNF4   SNF4 (HOMOLOG OF YEAST SUCROSE NONFERMENTING 4); protein kinase activator                                      | AT1G09020 | -2.460 | 0.182  | 9.117E-06 | 2.784E-04 |
| PtpAffx.208804.1.S1_at    | SUT2, ATUC3, SUC3, ATUT2   SUT2 (SUCROSE TRANSPORTER 2); sucrose transmembrane transporter                                    | AT2G02860 | -1.495 | 0.355  | 2.318E-03 | 1.272E-02 |
| PtpAffx.163121.1.S1_at    | AtcwiNV2   AtcwiNV2 (Arabidopsis thaliana cell wall invertase 2); hydrolase, hydrolyzing O-glycosyl compounds                 | AT3G52600 | -7.892 | 0.004  | 6.112E-11 | 4.695E-07 |
| PtpAffx.103096.1.S1_at    | beta-fructofuranosidase, putative / invertase, putative / saccharase, putative / beta-fructosidase, putative                  | AT4G34860 | -3.867 | 0.069  | 1.489E-06 | 9.097E-05 |
| Ptp.5816.1.S1_at          | invertase/pectin methyltransferase inhibitor family protein                                                                   | AT5G62360 | -4.950 | 0.032  | 3.770E-05 | 6.857E-04 |
| PtpAffx.8465.1.S1_at      | invertase/pectin methyltransferase inhibitor family protein                                                                   | AT1G62760 | -2.009 | 0.249  | 2.092E-03 | 1.174E-02 |
| PtpAffx.93131.1.S1_at     | ATAMY3, AMY3   AMY3 (ALPHA-AMYLASE-LIKE 3); alpha-amylase                                                                     | AT1G69830 | -3.846 | 0.070  | 1.929E-08 | 1.098E-05 |
| PtpAffx.212918.1.S1_s_at  | ATPU1, ATLDA, PU1   ATLDA (LIMIT DEXTRINASE); alpha-amylase/ limit dextrinase/ pullulanase                                    | AT5G04360 | -2.937 | 0.131  | 4.804E-07 | 4.853E-05 |
| Ptp.5279.1.S1_at          | CT-BMY, BAM3, BMY8   CT-BMY (CHLOROPLAST BETA-AMYLASE); beta-amylase                                                          | AT4G17090 | -4.665 | 0.039  | 8.718E-07 | 6.598E-05 |
| PtpAffx.3761.4.S1_at      | BMY3, BAM9   BMY3; beta-amylase/ catalytic/ cation binding                                                                    | AT5G18670 | -2.405 | 0.189  | 1.205E-04 | 1.485E-03 |
| PtpAffx.26085.1.S1_at     | LACS7, ATLACS7   LACS7 (LONG-CHAIN ACYL-COA SYNTHETASE 7); long-chain-fatty-acid-CoA ligase/ protein binding                  | AT5G27600 | -2.883 | 0.136  | 2.099E-04 | 2.185E-03 |
| PtpAffx.13681.1.S1_s_at   | long-chain-fatty-acid-CoA ligase family protein / long-chain acyl-CoA synthetase family protein (LACS8)                       | AT2G04350 | -1.462 | 0.363  | 1.400E-02 | 4.841E-02 |
| PtpAffx.13681.1.S1_s_at   | long-chain-fatty-acid-CoA ligase family protein / long-chain acyl-CoA synthetase family protein (LACS8)                       | AT2G04350 | -1.462 | 0.363  | 1.400E-02 | 4.841E-02 |
| PtpAffx.161.1.A1_at       | ACX2, ATACX2   ACX2 (ACYL-COA OXIDASE 2); acyl-CoA oxidase                                                                    | AT5G65110 | -1.032 | 0.489  | 6.777E-03 | 2.810E-02 |
| PtpAffx.161.1.A1_at       | ACX2, ATACX2   ACX2 (ACYL-COA OXIDASE 2); acyl-CoA oxidase                                                                    | AT5G65110 | -1.032 | 0.489  | 6.777E-03 | 2.810E-02 |
| PtpAffx.208467.1.S1_at    | IBR3   IBR3 (IBA-RESPONSE 3); acyl-CoA dehydrogenase/ oxidoreductase                                                          | AT3G06810 | -2.357 | 0.195  | 2.119E-04 | 2.196E-03 |
| Ptp.3421.2.S1_s_at        | AIM1   AIM1 (ABNORMAL INFLORESCENCE MERISTEM); enoyl-CoA hydratase                                                            | AT4G29010 | -3.031 | 0.122  | 2.274E-06 | 1.205E-04 |
| PtpAffx.111009.1.S1_at    | ECHIA, E-COAH-2   ECHIA (ENOYL-COA HYDRATASE/ISOMERASE A); catalytic                                                          | AT4G16210 | -1.848 | 0.278  | 1.496E-05 | 3.903E-04 |
| PtpAffx.111009.1.S1_at    | ECHIA, E-COAH-2   ECHIA (ENOYL-COA HYDRATASE/ISOMERASE A); catalytic                                                          | AT4G16210 | -1.848 | 0.278  | 1.496E-05 | 3.903E-04 |
| Ptp.1540.1.S1_a_at        | aconitate hydratase, cytoplasmic, putative / citrate hydro-lyase/aconitase, putative                                          | AT2G05710 | -2.238 | 0.212  | 2.767E-05 | 5.675E-04 |
| Ptp.1540.1.S1_a_at        | aconitate hydratase, cytoplasmic, putative / citrate hydro-lyase/aconitase, putative                                          | AT2G05710 | -2.238 | 0.212  | 2.767E-05 | 5.675E-04 |
| PtpAffx.2015.1.S1_s_at    | ICL   ICL (ISOCITRATE LYASE); catalytic/ isocitrate lyase                                                                     | AT3G21720 | -5.317 | 0.025  | 1.795E-07 | 3.030E-05 |
| PtpAffx.2015.1.S1_s_at    | ICL   ICL (ISOCITRATE LYASE); catalytic/ isocitrate lyase                                                                     | AT3G21720 | -5.317 | 0.025  | 1.795E-07 | 3.030E-05 |
| Ptp.7022.1.S1_at          | MLS   MLS (MALATE SYNTHASE); malate synthase                                                                                  | AT5G03860 | -4.131 | 0.057  | 1.925E-05 | 4.515E-04 |
| PtpAffx.52508.1.S1_x_at   | PGK   PGK (PHOSPHOGLYCERATE KINASE); phosphoglycerate kinase                                                                  | AT1G79550 | -2.049 | 0.242  | 8.882E-06 | 2.737E-04 |
| PtpAffx.52508.1.S1_x_at   | PGK   PGK (PHOSPHOGLYCERATE KINASE); phosphoglycerate kinase                                                                  | AT1G79550 | -2.049 | 0.242  | 8.882E-06 | 2.737E-04 |
| PtpAffx.18295.2.A1_s_at   | GAPC, GAPC-1, GAPC1   GAPC1 (GLYCERALDEHYDE-3-PHOSPHATE DEHYDROGENASE C SUBUNIT 1)                                            | AT3G04120 | -3.054 | 0.120  | 4.831E-04 | 3.936E-03 |
| PtpAffx.18295.2.A1_s_at   | GAPC, GAPC-1, GAPC1   GAPC1 (GLYCERALDEHYDE-3-PHOSPHATE DEHYDROGENASE C SUBUNIT 1)                                            | AT3G04120 | -3.054 | 0.120  | 4.831E-04 | 3.936E-03 |
| Ptp.6563.2.S1_at          | fructose-bisphosphate aldolase, putative                                                                                      | AT2G36460 | -1.072 | 0.476  | 4.237E-03 | 1.982E-02 |
| Ptp.6081.1.S1_at          | glucose-6-phosphate isomerase, cytosolic (PGIC)                                                                               | AT5G42740 | -1.080 | 0.473  | 3.493E-04 | 3.106E-03 |
| PtpAffx.3724.1.A1_at      | AtGolS2   AtGolS2 (Arabidopsis thaliana galactinol synthase 2); transferase, transferring glycosyl groups                     | AT1G56600 | -4.194 | 0.055  | 2.825E-04 | 2.663E-03 |
| PtpAffx.82184.1.S1_at     | ATQC, QC, QCT   QC (GLUTAMINYL CYCLASE); catalytic/ glutaminyl-peptide cyclotransferase                                       | AT4G25720 | 4.284  | 19.477 | 8.634E-07 | 6.567E-05 |
| PtpAffx.116307.1.S1_at    | glutamine-fructose-6-phosphate transaminase (isomerizing)/ sugar binding / transaminase                                       | AT3G24090 | 4.310  | 19.832 | 9.755E-06 | 2.911E-04 |
| PtpAffx.2469.1.A1_at      | ASN3   ASN3 (ASPARAGINE SYNTHETASE 3); asparagine synthase (glutamine-hydrolyzing)                                            | AT5G10240 | 1.253  | 2.384  | 1.204E-03 | 7.729E-03 |
| PtpAffx.249.322.1.S1_a_at | GS2, GLN2, ATGSL1   GS2 (GLUTAMINE SYNTHETASE 2); glutamate-ammonia ligase                                                    | AT5G35630 | 1.485  | 2.799  | 2.653E-02 | 7.947E-02 |
| PtpAffx.25006.1.S1_at     | NIR1, NIR, ATHNIR   NIR1 (NITRITE REDUCTASE 1); ferredoxin-nitrate reductase/ nitrite reductase (NO-forming)                  | AT2G15620 | 5.936  | 61.222 | 4.128E-08 | 1.455E-05 |
| Ptp.5714.1.S1_at          | ATNRT2.5   ATNRT2.5 (nitrate transporter 2.5); nitrate transmembrane transporter                                              | AT1G12940 | 4.120  | 17.385 | 4.779E-06 | 1.922E-04 |
| Ptp.5930.1.S1_s_at        | NIA1, GNR1, NR1   NIA1 (NITRATE REDUCTASE 1); nitrate reductase                                                               | AT1G77760 | 5.886  | 59.121 | 5.687E-06 | 2.116E-04 |
| PtpAffx.205004.1.S1_at    | CNX2   CNX2 (COFACTOR OF NITRATE REDUCTASE AND XANTHINE DEHYDROGENASE 2); catalytic                                           | AT2G31955 | 1.421  | 2.678  | 5.123E-04 | 4.089E-03 |
| PtpAffx.102478.1.A1_at    | NIA2, B29, NIA2-1, CHL3, NR, NR2, ATNR2   NIA2 (NITRATE REDUCTASE 2); nitrate reductase (NADH)/ nitrate reductase             | AT1G37130 | 2.255  | 4.772  | 2.977E-03 | 1.528E-02 |
